# Supplementary material for: Derivation of physical and optical properties of mid-latitude cirrus ice crystals for a size-resolved cloud microphysics model
Source: Copernicus journal article supplement (doi:10.5194/acp-16-7251-2016), 2016-06-10
Supplement: Supplementary file 1 [file acp-16-7251-2016-supplement.zip]

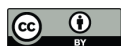

## *Supplement of*

# **Derivation of physical and optical properties of mid-latitude cirrus ice crystals for a size-resolved cloud microphysics model**

**Ann M. Fridlind et al.**

*Correspondence to:* Ann M. Fridlind (ann.fridlind@nasa.gov)

- acp-16-7251-2016-supplement-title-page.pdf
- ice\_properties
  - sparticus.input\_icef\_bucky
  - sparticus.input\_icef\_bullet
  - sparticus.input\_icef\_bullet\_aggregate
  - sparticus.input\_icef\_bullet\_u

The copyright of individual parts of the supplement might differ from the CC-BY 3.0 licence.
